# Supplementary material for: Wildlife culling as a biophobic response to zoonotic disease risk: why we need a one health approach to risk communication
Source: Frontiers journal article supplement (doi:10.3389/fcosc.2024.1488981), 2024-12-05
Supplement: Table_1.docx [file Table_1.docx]

Supplementary Material

To collect case studies of wildlife culling or habitat destruction for zoonoses mitigation, we queried “cull* AND wild* AND zoono*” in Web of Science. To focus on contemporary cases, we limited our review to publications from the 1950s to present. From this query, we reviewed 115 papers. We included only cases wherein populations of wildlife were culled to mitigate zoonotic risk. We excluded culls of wildlife for non-zoonotic pathogens (e.g., Manjerovic et al., 2014), culls of captive wildlife (e.g., Watts, 2004; Abbott, 2008; Pang and Siu, 2022), culls of free-ranging domestic animals (e.g., Zhang et al., 2009), or events wherein animals were culled for alternative reasons and retrospectively evaluated for zoonotic pathogens (e.g., Santos et al., 2024). From 115 articles, 21 met the inclusion criteria. Twelve of the 21 were analyses of badger culls in the United Kingdom to mitigate bovine tuberculosis (*Mycobacterium bovis*). We used citation tracking (Bakkalbasi et al., 2006) of papers reviewed in our analysis to find additional culling case studies. We reviewed the culling studies to determine the disease, pathogen, or parasite of interest; target host species; time period; number of animals culled; and efficacy of culling efforts. We also documented disease management strategies conducted concurrently with culling, as these may have influenced culling efficacy (Table 1).

# Table S1. Documented culls of wildlife populations or destruction of wildlife habitat implemented to mitigate zoonotic risk. For cases in which culling was implemented in conjunction with another management technique (e.g., vaccinations), the concurrent technique is indicated in brackets. Not Reported (NR) indicates the variable was not reported in the respective literature.

| Disease (causative pathogen or parasite) | Country | Target Species (N = native; O = nonnative) | Conducted or Authorized By (P = private citizens without permit;  A = a government or other authority) | Year(s) | Number of Animals Culled | Culling Strategy [*concurrent strategy*] | Efficacy | Citation |
| --- | --- | --- | --- | --- | --- | --- | --- | --- |
| Alveolar echinococcosis (*Echinococcus multilocularis*) | France | Red foxes (*Vulpes vulpes*) (N) | A | 2008 – 2012 | 872 | Hunting, trapping, spotlight shooting | Parasite prevalence increased in culling area | (Comte et al., 2017) |
| Bovine tuberculosis (*Mycobacterium bovis*) | Australia | Water buffalo (*Bubalus bubalis*) (O) | A | 1970 – 1997 | * | Helicopter & ground shooting [*cattle testing, culling, & movement restrictions*] | Country declared bTB-free | (More et al., 2015) |
| France | Wild boar (*Sus scrofa*) (O), red deer ( *Cervus elaphus*) (N), badgers (*Meles meles*) (N) | A | 2001–2006 | NR | NR | No change in prevalence after 2001-2005 culls; reduction in prevalence after 2006 cull. Continued prevalence among badgers ~3 years after study | (Hars et al., 2010) |
| New Zealand | Brushtail possums (*Trichosurus vulpecula*) (O) | A | 1971– present | NR | Toxicants, trapping [*cattle testing & slaughter*] | Reduction in bTB prevalence among cattle | (Livingstone et al., 2015; Warburton and Livingstone, 2015) |
| South Africa | African buffalo (*Syncerus caffer*) (N) | A | 1999 – 2006 | ~890 | Test and euthanize infected animals | Decreased bTB prevalence in managed herds and no spatial expansion of bTB outside of disease hotspots | (le Roex, 2014) |
| Spain | Wild boar (*Sus scrofa*) (O) | A | 2000–2011 | 2,428 | Increased hunting efforts | Decrease in wild boar abundance; decrease in TB prevalence among wild boar and other hosts | (Boadella et al., 2012) |
| Spain | Wild boar (*Sus scrofa*) (O | A | 2007-2012 | 293 | Hunting | Decrease in prevalence among fallow deer; increase in prevalence among male wild boar | (García-Jiménez et al., 2013) |
| United Kingdom | Badgers (*Meles meles*) (N) | A | 1973 – present | >230,000 | Trapping, shooting [*cattle testing, movement restrictions, & culling*] | Increased bTB prevalence in badgers; increased and decreased bTB prevalence among cattle herds | (Donnelly et al., 2003; Woodroffe et al., 2006; Bourne, 2007; Downs et al., 2019; McGill and Jones, 2019; Langton et al., 2022) |
| United States of America | White-tailed deer (*Odocoileus virginianus*) (N) | A | 2005 – 2010 | >2,600 | Hunting, sharpshooting [*ban on recreational feeding of wild cervids, test & slaughter cattle, cattle buy-outs, & feed fencing*] | Reduced deer density, decrease in prevalence among deer | (Carstensen and DonCarlos, 2011) |
| Brucellosis (*Brucella abortus*) | United States of America | Bison (*Bison bison*) (N) | A | 2005 – 2006 | >1,000 | Test and euthanize | Continued brucellosis in wildlife and domestic animals | (Bienen and Tabor, 2006; Miguel et al., 2020) |
| United States of America | Bison (*Bison bison*) (N) | A | 2023 | >1,530 | Hunting | NR | (Robbins, 2023) |
| COVID-19 / SARS-CoV2-2 (*Betacoronavirus pandemicum*) | Cuba | Bats+ | P | 2020 | NR | Fire | Not evaluated | (ADNCuba, 2020) |
| India | Bats+ | P | 2020 | ~200 | NR | Not evaluated | (Goyal, 2020) |
| Indonesia | Bats+ | P, A | 2020 | NR | Gassing | Not evaluated | (CNN Indonesia, 2020; Farhan and Assifa, 2020) |
| Peru | Bats+ | P | 2020 | NR | Fire | Not evaluated | (RTE News, 2020) |
| Rwanda | Bats+ | A | 2020 | N/A | Water cannon on roosts | Not evaluated | (Bittel, 2020) |
| *Cryptosporidium sp.* & *Giardia sp.* | Australia | Sambar (*Rusa unicolor*) (O) | A | 2008 – 2012 | 273 | Ground shooting, spotlight shooting | Decrease in fecal pellets from waterbody of concern, no apparent change in population size/density | (Bennett et al., 2015) |
| Ebola virus (*Orthoebolavirus sp.*) | Cameroon | Bats+ | NR | NR | NR | NR | NR | (Guyton and Brook, 2015) |
| Nigeria | Bats+ | A | NR | NR | NR | NR | (The Rainbow, 2014; Guyton and Brook, 2015) |
| Lassa fever (*Lassa mammarenavirus*) | Guinea | Natal mutlimammate mouse (*Mastomys natalensis*) (N) and other rodents+ | A | 2014 – 2019 | NR | Toxicants, trapping | Temporary reduction in rodent populations; increase in Lassa virus spillover to humans | (Mariën et al., 2024) |
| Leptospirosis (*Leptospira interrogans*) | Canada | Norway rats (*Rattus norvegicus*) (O) | A | 2016 – 2017 | NR | Trapping | Increase in pathogen prevalence in control sites | (Lee et al., 2018) |
| Marburg Virus Disease (*Orthomarburgvirus marburgense*) | Uganda | Egyptian fruit bats (*Rousettus aegyptiacus*) (N) | P | 2008 | 100,000 | Netting | Increase in virus seroprevalence | (Amman et al., 2014; Towner et al., 2024) |
| Plague (*Yersinia pestis*) | Madagascar | Black rats (*Rattus rattus*) (O); Asian house shrew (*Suncus muinus*) (O) | A | 2016 | >4,302 | Toxicants, trapping [*Community education*] | Reduction in plague incidence among humans in treatment sites | (Rahelinirina et al., 2023) |
| Rabies (*Lyssavirus rabies*) | Argentina | Common vampire bats (*Desmodus rotundus*) (N) | A | August–September, year unspecified | >363 | Cyanide gassing | Rabies not detected in livestock outside of control area | (Fornes et al., 1974) |
| Canada | Red foxes (*Vulpes vulpes*) (N),  coyotes (*Canis latrans*) (N),  Eurasian lynx (*Lynx lynx*) (N),  wolves (*Canis lupus*) (N),  bears+(N),  skunks+ (N),  cougars (*Puma concolor*) (N),  fishers (*Pekania pennanti*) (N) | A | 1952 – 1955 | 55,499  50,781  9,927  5,271  3,827  664  69  18 | Trapping, toxicants [*vaccination of domestic dogs*] | Temporary eradication of rabies in Alberta | (Ballantyne, 1956; Fehlner-Gardiner, 2018) |
| Canada | Striped skunks (*Mephitis mephitis*) (N) | A | 1970s – 1980s | >3,200 | Trapping, toxicants | Temporary reduction in skunk density; geographic expansion of rabies | (Gunson et al., 1978; Fehlner-Gardiner, 2018) |
| Canada | Raccoons (*Procyon lotor*) (N) &  striped skunks (*Mephitis mephitis*) (N) | A | July–Oct 1999 | 1,202  337 | Trapping [*vaccination of wildlife hosts and domestic cats*] | Reduction in raccoon population density | (Rosatte et al., 2001) |
| Colombia | Bats+ | A | ≤2004 – present | Not evaluated | Toxicants, roost destruction | Not evaluated | (Instituto Colombiano Agropecuario, 2004, 2022; Asprilla-Aguilar et al., 2007) |
| Denmark | Foxes (*Vulpes vulpes*) (N) | A | 1964 – 1982 | NR | Gassing, shooting | Eradication of rabies among terrestrial wild mammals in Denmark | (Aubert, 1999) |
| France | Red foxes (*Vulpes vulpes*) (N) | A | 1988 – 1993 | NR | Trapping, shooting, toxicants, gassing [*vaccination of domestic animals, oral fox vaccination*] | Temporary reduction in rabies occurrence | (Aubert, 1999) |
| Mexico | Wolves+, coyotes (*Canis latrans*) (N), foxes+, skunks+ | A | 1950s | >18,000 | Toxicants | Target animal populations decreased | (Cocozza and Alba, 1962; Fehlner-Gardiner, 2018) |
| Mexico | Coyotes (*Canis latrans*) (N) | A | 1961 | Not evaluated | Toxicants | Anecdotal reports of decreased abundance | (Cocozza and Alba, 1962) |
| Peru | Common vampire bats (*Desmodus rotundus*) (N) | A | 2014 – 2016 | >20,000 | Toxicants [*livestock vaccination*] | Reduction in bat population density, decrease in viral spread in areas culled prior to virus arrival, increase in transmission in areas culled reactively | (Viana et al., 2023)** |
| United States of America | Foxes+ (N), skunks+ (N), coyotes (*Canis latrans*) (N) | A | 1940s – 1980s | NR | Shooting, trapping, toxicants | Temporary, localized eradications of rabies | (Parker, 1970; Fehlner-Gardiner, 2018) |
| Salmonella (*Salmonella spp.*) | Spain | Wild boar (*Sus scrofa*) (O) | A | 2007 – 2011 | ≥148 | Increase in hunting effort via shooting and addition of trapping [*cattle removal*] | Non-significant reduction in boar abundance and *Salmonella* prevalence | (Mentaberre et al., 2013) |

+Species not specified and unable to be deduced based on common name and locality provided.

*The number of water buffalo culled was not reported. The water buffalo population was estimated to include 350,00 individuals prior to culling and 150,000 individuals in 2011 (Australian Government, 2011).

**This study evaluated a cull from 2014–2016 but noted culls have been on-going in Latin America since the 1970s.

Literature Cited

Abbott, A. (2008). French university under fire for culling macaques. *Nature* 455, 145.

ADNCuba (2020). Exterminan colonias de murciélagos en Cuba por temor al coronavirus. Available at: https://adncuba.com/noticias-de-cuba/exterminan-colonias-de-murcielagos-en-cuba-por-temor-al-coronavirus?fbclid=IwAR00CX2jebE_Y_x0bMEGHtw1NNx9bcax183ZBZ8X2Ze3bYZkbzY9QHrPh0M [Accessed August 15, 2024].

Amman, B. R., Nyakarahuka, L., McElroy, A. K., Dodd, K. A., Sealy, T. K., Schuh, A. J., et al. (2014). Marburgvirus resurgence in Kitaka Mine bat population after extermination attempts, Uganda. *Emerg. Infect. Dis.* 20, 1761–1764. doi: 10.3201/eid2010.140696

Asprilla-Aguilar, A. A., Mantilla-Meluk, H., and Jiménez-Ortega, A. M. (2007). Analysis of the non-hematophagous bat species captured within the plan of eradication of *Desmodus rotundus* (e. Geoffroy, 1810) in the Bolombian biogeographic Chocó. *Revista Institucional Universidad Tecnológica del Chocó* 26, 42–48.

Aubert, M. F. A. (1999). Costs and benefits of rabies control in wildlife in France. *Rev. Sci. Tech. OIE* 18, 533–543. doi: 10.20506/rst.18.2.1174

Australian Government Department of Sustainability, Environment, Water, Population and Communities. (2011). The feral water buffalo (*Bubalus bubalis*). *The feral water buffalo (Bubalus bubalis)*. Available at: https://www.agriculture.gov.au/sites/default/files/documents/buffalo.pdf [Accessed August 29, 2024].

Bakkalbasi, N., Bauer, K., Glover, J., and Wang, L. (2006). Three options for citation tracking: Google Scholar, Scopus and Web of Science. *Biomed Digit Libr* 3, 7. doi: 10.1186/1742-5581-3-7

Ballantyne, E. E. (1956). Rabies control program In Alberta. *Can J Comp Med Vet Sci* 20, 21–30.

Bennett, A., Haydon, S., Stevens, M., and Coulson, G. (2015). Culling reduces fecal pellet deposition by introduced sambar (*Rusa unicolor*) in a protected water catchment. *Wildlife Society Bulletin* 39, 268–275. doi: 10.1002/wsb.522

Bienen, L., and Tabor, G. (2006). Applying an ecosystem approach to brucellosis control: can an old conflict between wildlife and agriculture be successfully managed? *Frontiers in Ecology and the Environment* 4, 319–327.

Bittel, J. (2020). Experts urge people all over the world to stop killing bats out of fears of Coronavirus. Available at: https://www.nrdc.org/stories/experts-urge-people-all-over-world-stop-killing-bats-out-fears-coronavirus [Accessed June 3, 2024].

Boadella, M., Vicente, J., Ruiz-Fons, F., de la Fuente, J., and Gortázar, C. (2012). Effects of culling Eurasian wild boar on the prevalence of *Mycobacterium bovis* and Aujeszky’s disease virus. *Preventive Veterinary Medicine* 107, 214–221. doi: 10.1016/j.prevetmed.2012.06.001

Bourne, F. (2007). Final Report of the Independent Scientific Group on Cattle TB. Independent Scientific Group on Cattle TB. Available at: https://www.bovinetb.info/docs/final_report.pdf [Accessed August 29, 2024].

Carstensen, M., and DonCarlos, M. W. (2011). Preventing the establishment of a wildlife disease reservoir: a case study of Bovine Tuberculosis in wild deer in Minnesota, USA. *Veterinary Medicine International* 2011, 1–10. doi: 10.4061/2011/413240

CNN Indonesia (2020). Cegah Corona, pasar depok Solo musnahkan ratusan kelelawar. Available at: https://www.cnnindonesia.com/nasional/20200314153513-20-483413/cegah-corona-pasar-depok-solo-musnahkan-ratusan-kelelawar [Accessed August 29, 2024].

Cocozza, J., and Alba, A. M. (1962). Wildlife control project in Baja California. *Public Health Reports (1896-1970)* 77, 147–151. doi: 10.2307/4591437

Comte, S., Umhang, G., Raton, V., Raoul, F., Giraudoux, P., Combes, B., et al. (2017). *Echinococcus multilocularis* management by fox culling: an inappropriate paradigm. *Prev Vet Med* 147, 178–185. doi: 10.1016/j.prevetmed.2017.09.010

Donnelly, C. A., Woodroffe, R., Cox, D. R., Bourne, J., Gettinby, G., Le Fevre, A. M., et al. (2003). Impact of localized badger culling on tuberculosis incidence in British cattle. *Nature* 426, 834–837. doi: 10.1038/nature02192

Downs, S., Prosser, A., Ashton, A., Ashfield, S., Brunton, L. A., Brouwer, A., et al. (2019). Assessing effects from four years of industry-led badger culling in England on the incidence of bovine tuberculosis in cattle, 2013–2017. *Scientific Reports* 9, 1–14.

Farhan, F., and Assifa, F. (2020). Bupati Subang imbau basmi kelelawar, Dedi mulyadi sebut kebijakan tak berdasar. Available at: https://regional.kompas.com/read/2020/03/20/16193791/bupati-subang-imbau-basmi-kelelawar-dedi-mulyadi-sebut-kebijakan-tak [Accessed August 29, 2024].

Fehlner-Gardiner, C. (2018). Rabies control in North America – past, presentand future. *Rev. Sci. Tech. OIE* 37, 421–437. doi: 10.20506/rst.37.2.2812

Fornes, A., Lord, R. D., Kuns, M. L., Larghi, O. P., Fuenzalida, E., and Lazara, L. (1974). Control of bovine rabies through vampire bat control. *Journal of Wildlife Diseases* 10, 310–316. doi: 10.7589/0090-3558-10.4.310

García-Jiménez, W. L., Fernández-Llario, P., Benítez-Medina, J. M., Cerrato, R., Cuesta, J., García-Sánchez, A., et al. (2013). Reducing Eurasian wild boar (*Sus scrofa*) population density as a measure for bovine tuberculosis control: effects in wild boar and a sympatric fallow deer (*Dama dama*) population in Central Spain. *Preventive Veterinary Medicine* 110, 435–446. doi: 10.1016/j.prevetmed.2013.02.017

Goyal, Y. (2020). More than 150 bats killed in Rajasthan owing to fear of COVID-19 spread. *The Tribune*. Available at: https://www.tribuneindia.com/news/nation/more-than-150-bats-killed-in-rajasthan-owing-to-fear-of-covid-19-spread-81668?fbclid=IwAR0y8PXDD7tMzTGtqQWw0RPJI2e6JutlSVI1eDDAfNhYuRoRYnDNP5DMdr4 [Accessed August 29, 2024].

Gunson, J. R., Dorward, W. J., and Schowalter, D. B. (1978). An evaluation of rabies control in skunks in Alberta. *Can Vet J* 19, 214–220.

Guyton, J. A., and Brook, C. E. (2015). African Bats: conservation in the time of Ebola. *THERYA* 6, 69–88.

Hars, J., Richomme, C., and Boschiroli, M. (2010). La tuberculose bovine dans la faune sauvage en France. *Bulletin épiémiologique* 38, 28–32.

Instituto Colombiano Agropecuario (2004). Control de murciélagos hemtófagos o vampiros. Resolución No. 003361

Instituto Colombiano Agropecuario (2022). The ICA carried out activities to control rabies of wild origin in Quindío. Available at: https://www.ica.gov.co/noticias/ica-actividades-control-rabia-origen-silvestre

Langton, T. E. S., Jones, M. W., and McGill, I. (2022). Analysis of the impact of badger culling on bovine tuberculosis in cattle in the high-risk area of England, 2009–2020. *Veterinary Record* 190, e1384. doi: 10.1002/vetr.1384

le Roex, N. (2014). Host genetic factors in susceptibility to mycobacterial disease in the African buffalo, *Syncerus caffer*. [dissertation]. [Stellenbosch, South Africa]: Stellenbosch University.

Lee, M. J., Byers, K. A., Donovan, C. M., Bidulka, J. J., Stephen, C., Patrick, D. M., et al. (2018). Effects of culling on *Leptospira interrogans* carriage by rats. *Emerging Infectious Diseases* 24, 356–360. doi: 10.3201/eid2402.171371

Livingstone, P., Hancox, N., Nugent, G., and de Lisle, G. (2015). Toward eradication: the effect of *Mycobacterium bovis* infection in wildlife on the evolution and future direction of bovine tuberculosis management in New Zealand. *N Z Vet J* 63, 4–18. doi: 10.1080/00480169.2014.971082

Manjerovic, M. B., Green, M. L., Mateus-Pinilla, N., and Novakofski, J. (2014). The importance of localized culling in stabilizing chronic wasting disease prevalence in white-tailed deer populations. *Preventive Veterinary Medicine* 113, 139–145. doi: 10.1016/j.prevetmed.2013.09.011

Mariën, J., Sage, M., Bangura, U., Lamé, A., Koropogui, M., Rieger, T., et al. (2024). Rodent control strategies and Lassa virus: some unexpected effects in Guinea, West Africa. *Emerging Microbes & Infections* 13, 2341141. doi: 10.1080/22221751.2024.2341141

McGill, I., and Jones, M. (2019). Cattle infectivity is driving the bTB epidemic. *Veterinary Record* 185, 699–700. doi: 10.1136/vr.l6845

Mentaberre, G., Porrero, M. C., Navarro‐Gonzalez, N., Serrano, E., Domínguez, L., and Lavín, S. (2013). Cattle Drive *Salmonella* infection in the wildlife–livestock interface. *Zoonoses and Public Health* 60, 510–518. doi: 10.1111/zph.12028

Miguel, E., Grosbois, V., Caron, A., Pople, D., Roche, B., and Donnelly, C. A. (2020). A systemic approach to assess the potential and risks of wildlife culling for infectious disease control. *Commun Biol* 3, 353. doi: 10.1038/s42003-020-1032-z

More, S. J., Radunz, B., and Glanville, R. J. (2015). Lessons learned during the successful eradication of bovine tuberculosis from Australia. *Vet Rec* 177, 224–232. doi: 10.1136/vr.103163

Pang, J., and Siu, T. (2022). Hong Kong to cull 2,000 hamsters after COVID-19 outbreak. *Reuters*. Available at: https://www.reuters.com/world/china/hong-kong-orders-hamster-cull-after-covid-19-hits-pets-2022-01-18/ [Accessed August 29, 2024].

Parker, R. L. Importance of wildlife rabies control., in *Proceedings of the 4th Annual Vertebrate Pest Conference*; 1970 March 3–5 West Sacramento, California, USA.

Rahelinirina, S., Rahajandraibe, S., Rakotosamimanana, S., and Rajerison, M. (2023). Assessing the effectiveness of intervention to prevent plague through community and animal-based survey. *PLOS Glob Public Health* 3, e0002211. doi: 10.1371/journal.pgph.0002211

Robbins, J. (2023). Mass Yellowstone Hunt Kills 1,150 Bison. *New York Times*. Available at: https://www.nytimes.com/2023/04/04/science/bison-hunt-yellowstone-native-americans.html [Accessed August 29, 2024].

Rosatte, R., Donovan, D., Allan, M., Howes, L.-A., Silver, A., Bennett, K., et al. (2001). Emergency response to raccoon rabies introduction into Ontario. *Journal of Wildlife Diseases* 37, 265–279. doi: 10.7589/0090-3558-37.2.265

RTE News (2020). Authorities in Peru prevent bat burning. Available at: https://www.rte.ie/news/coronavirus/2020/0325/1126393-authorities-in-peru-prevent-bat-burning/ [Accessed August 29, 2024].

Santos, A. T., Riva, E., Condorí, W. E., Fernández, V., Rodriguez, M. G., Rivero, M. A., et al. (2024). Trichinella infection in culled wild boar (*Sus scrofa*) from El Palmar National Park, Argentina, and exposure risk in humans and dogs consuming wild boar meat. *J Wildl Dis* 60, 401–412. doi: 10.7589/JWD-D-23-00027

The Rainbow (2014). Ebola: FG targets fruit bats, healthcare wastes. Available at: https://www.thenigerianvoice.com/news/155677/50/ebola-fg-targets-fruit-bats-healthcare-wastes.html [Accessed August 29, 2024].

Towner, J., Nyakarahuka, L., and Atimnedi, P. (2024). Bat-borne pathogens and public health in rural African artisanal gold mines. *AMA Journal of Ethics* 26, E109-115. doi: 10.1001/amajethics.2024.109

Viana, M., Benavides, J. A., Broos, A., Ibañez Loayza, D., Niño, R., Bone, J., et al. (2023). Effects of culling vampire bats on the spatial spread and spillover of rabies virus. *Sci. Adv.* 9, eadd7437. doi: 10.1126/sciadv.add7437

Warburton, B., and Livingstone, P. (2015). Managing and eradicating wildlife tuberculosis in New Zealand. *New Zealand Veterinary Journal* 63, 77–88. doi: 10.1080/00480169.2014.981315

Watts, J. (2004). China culls wild animals to prevent new SARS threat. *The Lancet* 363.

Woodroffe, R., Donnelly, C. A., Cox, D. R., Bourne, F. J., Cheeseman, C. L., Delahay, R. J., et al. (2006). Effects of culling on badger *Meles meles* spatial organization: implications for the control of bovine tuberculosis. *Journal of Applied Ecology* 43, 1–10. doi: 10.1111/j.1365-2664.2005.01144.x

Zhang, W., Zhang, Z., Yimit, T., Shi, B., Aili, H., Tulson, G., et al. (2009). A pilot study for control of Hyperendemic Cystic Hydatid Disease in China. *PLoS Negl Trop Dis* 3, e534. doi: 10.1371/journal.pntd.0000534
